# Supplementary material for: A new species of terrestrial frog of the genus Noblella Barbour, 1930 (Amphibia: Strabomantidae) from the Llanganates-Sangay Ecological Corridor, Tungurahua, Ecuador
Source: PeerJ. 2019 Aug 12;7:e7405. doi: 10.7717/peerj.7405 (PMC6694786; doi:10.7717/peerj.7405)
Supplement: Supplemental Information 1 [file peerj-07-7405-s001.xlsx]

## Sheet: Hoja1
	sex	male	female	female	juvenile	female	female	male	male	female	male
CHARACTERES		13307	13390	13391	13393	14420	14493	14494	14411	934	933
Snout vent length	SVL	13.61	13.65	13.13	8.36	14.15	13.68	12.12	11.17	14.4	11.4
Head lenght	HL	4.25	4.54	4.22	3.04	4.4	4.47	4.19	3.91	6.1	4.2
Head width	HW	4.48	4.84	4.23	3	4.91	4.46	4.14	3.72	5.4	3.7
Eye diameter	ED	1.88	1.6	1.7	1.3	1.91	2.04	1.64	1.47	1.6	1.1
Eye nostril distance	EN	0.98	0.85	0.94	0.75	1.03	1.02	0.94	1.09	0.9	0.8
Eyelid width	MWE	1.17	1.25	1.11	0.75	1.52	1.04	0.72	1.04	1.22	0.7
Tympanum diameter	TD	0.78	0.72	0.48	0.36	0.83	0.45	0.71	0.66	0.7	0.5
Minimun interorbital distance	MIOD	1.58	1.81	1.31	0.59	1.52	1.42	1.12	1.22	2.5	2.2
Lenght of the hand	LH	2.7	2.47	2.59	1.39	2.76	2.68	2.41	2.25	2.5	2.4
Lenght of the shank	LS	6.45	4.17	3.78	2.59	4.09	4.34	3.29	3.22	6.4	5.8
Lenght of the foot	LF	5.92	5.34	5.63	2.99	5.91	5.15	5.06	4.92	5.8	5.1
						DHMECN
						ZSFQ
