# Supplementary material for: A new species of terrestrial frog of the genus Noblella Barbour, 1930 (Amphibia: Strabomantidae) from the Llanganates-Sangay Ecological Corridor, Tungurahua, Ecuador
Source: PeerJ. 2019 Aug 12;7:e7405. doi: 10.7717/peerj.7405 (PMC6694786; doi:10.7717/peerj.7405)
Supplement: Supplemental Information 2 — The specific localities are included. [file peerj-07-7405-s002.xlsx]

## Sheet: Hoja1
ID	Latitude	Longitude	Elevation	Country	Province	Locality	Source_Museum
Noblella_nature	-1.34958	-78.4024	2400	Ecuador	Tungurahua	Reserva Vizcaya	Noblella_DHMECN
Noblella_nature	-1.37305	-78.4067	2037	Ecuador	Tungurahua	near to Vizcaya road	NoblellaZSFQ
Noblella_nature	-1.39622	-78.3942	2400	Ecuador	Tungurahua	Reserva Vizcaya	Noblella_DHMECN
Noblella_nature	-1.42872	-78.3042	2000	Ecuador	Tungurahua	Reserva Candelaria	Noblella_DHMECN
